# Supplementary material for: Diverse Interactions: Root-Nodule Formation and Herb-Layer Composition in Black Locust (Robinia pseudoacacia) Stands
Source: MDPI journal article supplement (doi:10.3390/plants12183253), 2023-09-13
Supplement: s1 [file s1]

## Supplementary material

**Table S1.** The species occurring in herb layer in the order of cumulative cover

| Species                        | Cumulative cover |
|--------------------------------|------------------|
| <i>Bromus sterilis</i>         | 631.0            |
| <i>Chelidonium majus</i>       | 352.5            |
| <i>Melica uniflora</i>         | 266.0            |
| <i>Poa nemoralis</i>           | 242.5            |
| <i>Brachypodium sylvaticum</i> | 213.0            |
| <i>Anthriscus sylvestris</i>   | 209.5            |
| <i>Urtica dioica</i>           | 192.0            |
| <i>Poa pratensis</i>           | 143.0            |
| <i>Stellaria holostea</i>      | 103.5            |
| <i>Geum urbanum</i>            | 83.0             |
| <i>Elymus repens</i>           | 73.5             |
| <i>Anthriscus cerefolium</i>   | 62.5             |
| <i>Rubus caesius</i>           | 62.5             |
| <i>Humulus lupulus</i>         | 58.5             |
| <i>Brachypodium pinnatum</i>   | 55.5             |
| <i>Galium aparine</i>          | 54.5             |
| <i>Stellaria media</i>         | 50.0             |
| <i>Ballota nigra</i>           | 46.5             |
| <i>Convolvulus arvensis</i>    | 41.5             |
| <i>Lamium purpureum</i>        | 39.0             |
| <i>Lamium maculatum</i>        | 37.5             |
| <i>Ajuga reptans</i>           | 34.0             |
| <i>Solidago canadensis</i>     | 33.0             |
| <i>Stachys sylvatica</i>       | 24.0             |
| <i>Dryopteris filix-mas</i>    | 19.0             |
| <i>Carex sylvatica</i>         | 18.0             |
| <i>Ligustrum vulgare</i>       | 17.0             |
| <i>Cornus sanguinea</i>        | 16.0             |
| <i>Carex pilosa</i>            | 15.0             |
| <i>Fallopia convolvulus</i>    | 12.5             |
| <i>Carex hirta</i>             | 8.5              |
| <i>Crataegus monogyna</i>      | 8.0              |
| <i>Erigeron annuus</i>         | 8.0              |
| <i>Geranium robertianum</i>    | 7.5              |
| <i>Robinia pseudoacacia</i>    | 7.5              |
| <i>Solidago gigantea</i>       | 6.0              |
| <i>Carex divulsa</i>           | 5.5              |
| <i>Dactylis glomerata</i>      | 5.5              |
| <i>Euphorbia cyparissias</i>   | 5.5              |
| <i>Fragaria vesca</i>          | 5.0              |
| <i>Galeobdolon luteum</i>      | 5.0              |
| <i>Prunus spinosa</i>          | 5.0              |
| <i>Quercus cerris</i>          | 5.0              |
| <i>Sambucus ebulus</i>         | 5.0              |

|                                |     |
|--------------------------------|-----|
| <i>Galeopsis pubescens</i>     | 4.5 |
| <i>Sambucus nigra</i>          | 4.5 |
| <i>Viola arvensis</i>          | 4.5 |
| <i>Calamagrostis epigeios</i>  | 4.0 |
| <i>Dryopteris carthusiana</i>  | 4.0 |
| <i>Clematis vitalba</i>        | 3.0 |
| <i>Festuca rupicola</i>        | 3.0 |
| <i>Galeopsis speciosa</i>      | 3.0 |
| <i>Hypericum perforatum</i>    | 3.0 |
| <i>Acer campestre</i>          | 2.5 |
| <i>Arctium lappa</i>           | 2.5 |
| <i>Fragaria viridis</i>        | 2.5 |
| <i>Alliaria petiolata</i>      | 2.0 |
| <i>Mycelis muralis</i>         | 2.0 |
| <i>Sanicula europaea</i>       | 2.0 |
| <i>Silene latifolia</i>        | 2.0 |
| <i>Viola reichenbachiana</i>   | 2.0 |
| <i>Agrimonia eupatoria</i>     | 1.5 |
| <i>Carex remota</i>            | 1.5 |
| <i>Carpinus betulus</i>        | 1.5 |
| <i>Chenopodium album</i>       | 1.5 |
| <i>Erigeron canadensis</i>     | 1.5 |
| <i>Juncus effusus</i>          | 1.5 |
| <i>Physalis alkekengi</i>      | 1.5 |
| <i>Quercus petraea</i>         | 1.5 |
| <i>Rosa canina</i>             | 1.5 |
| <i>Setaria pumila</i>          | 1.5 |
| <i>Acer platanoides</i>        | 1.0 |
| <i>Alopecurus pratensis</i>    | 1.0 |
| <i>Asclepias syriaca</i>       | 1.0 |
| <i>Cannabis sativa</i>         | 1.0 |
| <i>Circaea lutetiana</i>       | 1.0 |
| <i>Cornus mas</i>              | 1.0 |
| <i>Leonurus cardiaca</i>       | 1.0 |
| <i>Polygonatum multiflorum</i> | 1.0 |
| <i>Polygonum lapathifolium</i> | 1.0 |
| <i>Polygonum persicaria</i>    | 1.0 |
| <i>Prunella vulgaris</i>       | 1.0 |
| <i>Rumex sanguineus</i>        | 1.0 |
| <i>Veronica hederifolia</i>    | 1.0 |
| <i>Ambrosia artemisifolia</i>  | 0.5 |
| <i>Arrhenatherum elatius</i>   | 0.5 |
| <i>Asparagus officinalis</i>   | 0.5 |
| <i>Astragalus glycyphyllos</i> | 0.5 |
| <i>Berteroa incana</i>         | 0.5 |
| <i>Bidens tripartitus</i>      | 0.5 |
| <i>Bromus inermis</i>          | 0.5 |
| <i>Calystegia sepium</i>       | 0.5 |
| <i>Campanula trachelium</i>    | 0.5 |
| <i>Cardamine impatiens</i>     | 0.5 |

---

|                                |     |
|--------------------------------|-----|
| <i>Celtis occidentalis</i>     | 0.5 |
| <i>Clinopodium vulgare</i>     | 0.5 |
| <i>Conium maculatum</i>        | 0.5 |
| <i>Corylus avellana</i>        | 0.5 |
| <i>Crataegus laevigata</i>     | 0.5 |
| <i>Cruciata laevipes</i>       | 0.5 |
| <i>Cydonia oblonga</i>         | 0.5 |
| <i>Echinochloa crus-galli</i>  | 0.5 |
| <i>Fagus sylvatica</i>         | 0.5 |
| <i>Glechoma hederacea</i>      | 0.5 |
| <i>Ornithogalum boucheanum</i> | 0.5 |
| <i>Parietaria officinalis</i>  | 0.5 |
| <i>Plantago major</i>          | 0.5 |
| <i>Prunus padus</i>            | 0.5 |
| <i>Pulmonaria officinalis</i>  | 0.5 |
| <i>Pyrus pyraster</i>          | 0.5 |
| <i>Quercus robur</i>           | 0.5 |
| <i>Rumex acetosella</i>        | 0.5 |
| <i>Salix alba</i>              | 0.5 |
| <i>Saponaria officinalis</i>   | 0.5 |
| <i>Scrophularia nodosa</i>     | 0.5 |
| <i>Setaria viridis</i>         | 0.5 |
| <i>Silene noctiflora</i>       | 0.5 |
| <i>Taraxacum officinale</i>    | 0.5 |
| <i>Ulmus minor</i>             | 0.5 |
| <i>Verbascum phoeniceum</i>    | 0.5 |
| <i>Viola hirta</i>             | 0.5 |

---
